# Supplementary material for: Mathematical Models of E-Antigen Mediated Immune Tolerance and Activation following Prenatal HBV Infection
Source: PLoS One. 2012 Jul 2;7(7):e39591. doi: 10.1371/journal.pone.0039591 (PMC3388102; doi:10.1371/journal.pone.0039591)
Supplement: Supporting Information S1 — Here we perform asymptotic analysis for the models given by (1–3) and (6–10). (PDF) [file pone.0039591.s003.pdf]

# Mathematical models of immunological tolerance and immune activation following prenatal infection with hepatitis B virus

## Supplementary Materials

### Model analysis of one-virus model

$$\frac{dV_p}{dt} = r_p V_p \left(1 - \frac{V_p}{K}\right) - \mu_p V_p T_p, \quad (1)$$

$$\frac{de}{dt} = \pi V_p - \delta e, \quad (2)$$

$$\frac{dT_p}{dt} = \frac{\alpha_p V_p T_p}{1 + \sigma e} - dT_p. \quad (3)$$

**Proposition 1.** *Each component of the solution of system (1-3), subject to  $0 \leq V_p(0) \leq K$ ,  $e(0) \geq 0$ ,  $T_p(0) \geq 0$  remains bounded and non-negative for all  $t > 0$ .*

*Proof.* Because the system (1-3) is locally Lipschitz at  $t = 0$ , its solution exists on the interval  $[0, b)$  for some number  $b > 0$ .

Suppose that there exists  $t_1 \in (0, b)$  such that  $e(t_1) = 0$ , and  $V_p(t) > 0$ ,  $e(t) > 0$ ,  $T_p(t) > 0$  for  $0 < t < t_1$ . For all  $t \in [0, t_1]$  we have

$$\frac{de}{dt} = \pi V_p - \delta e \geq -\delta e.$$

The exponential solution is a lower bound of  $e(t)$ , and  $e(t_1) \geq e(0)e^{-\delta t_1} > 0$ , which contradicts the  $e(t_1) = 0$  assumption.

Similarly, assume there exists  $t_1 \in (0, b)$  such that  $T_p(t_1) = 0$ , and  $V_p(t) > 0$ ,  $e(t) > 0$ ,  $T_p(t) > 0$  for  $0 < t < t_1$ . For all  $t \in [0, t_1]$  we have

$$\frac{dT_p}{dt} = \frac{\alpha_p V_p T_p}{1 + \sigma e} - dT_p \geq -dT_p.$$

The exponential solution is a lower bound of  $T_p(t)$ , and  $T_p(t_1) \geq T_p(0)e^{-dt_1} > 0$ , which contradicts the  $T_p(t_1) = 0$  assumption.

Finally, assume there exists  $t_1 \in (0, b)$  such that  $V_p(t_1) = 0$ , and  $V_p(t) > 0$ ,  $e(t) > 0$ ,  $T_p(t) > 0$  for  $0 < t < t_1$ . For all  $t \in [0, t_1]$  we have

$$\frac{dV_p}{dt} = r_p V_p \left(1 - \frac{V_p}{K}\right) - \mu_p T_p V_p \geq -\mu_p T_p V_p.$$

Then  $V_p(t_1) \geq V_p(0)e^{-\mu \int_0^{t_1} T_p(t) dt} > 0$ , which contradicts the  $V_p(t_1) = 0$  assumption.

We can now verify that the solutions are bounded. Since

$$\frac{dV_p}{dt} = r_p V_p \left(1 - \frac{V_p}{K}\right) - \mu_p T_p V_p \leq r_p V_p \left(1 - \frac{V_p}{K}\right),$$

we have that  $V_p$  is bounded above by a solution to the logistic equation, with initial condition  $V_p(0) \leq K$ . We conclude that  $V_p(t) \leq K$  for all  $t \in [0, b)$ .

Since  $V_p(t) \leq K$ ,

$$\frac{de}{dt} = \pi V_p - \delta e \leq \pi K - \delta e$$

and  $e(t) \leq \frac{K\pi}{\delta} + (e(0) - \frac{K\pi}{\delta})e^{-\delta t} \leq \max\{e(0), \frac{K\pi}{\delta}\}$  for  $t \geq 0$ .

Finally, let  $z = \alpha_p V_p + \mu_p T_p$ . For  $V_p(t) \leq K$  and  $e(t) \geq 0$ ,

$$\frac{dz}{dt} = \frac{\alpha_p \mu_p V_p T_p}{1 + \sigma e} - \alpha_p \mu_p V_p T_p + r_p \alpha_p V_p \left(1 - \frac{V_p}{K}\right) - d \mu_p T_p \leq (r_p + d) \alpha_p K - dz.$$

Therefore  $z(t) \leq \frac{(r_p + d) \alpha_p}{d} K + \left(z(0) - \frac{(r_p + d) \alpha_p}{d} K\right) e^{-dt} \leq \max\{z(0), \frac{(r_p + d) \alpha_p}{d} K\}$ . Since  $V_p(t)$  and  $z(t)$  are bounded it follows that  $T_p(t)$  is bounded on  $[0, b)$ .

System (1-3) together with initial conditions  $0 \leq V_p(0) \leq K$ ,  $e(0) \geq 0$ ,  $T_p(0) \geq 0$  has positive and bounded solutions for all  $t \in [0, b)$ . This implies that  $b = \infty$ .  $\square$

System (1-3) has three steady states: a biologically irrelevant steady state,  $S_0 = (0, 0, 0)$ , a state representing immune tolerance,  $S_T = (\bar{V}_p, \bar{e}, \bar{T}_p) = (K, \frac{K\pi}{\delta}, 0)$ , and a state representing immune activation,  $S_L = (\bar{V}_p, \bar{e}, \bar{T}_p) = \left(\Omega, \frac{\pi\Omega}{\delta}, \frac{r_p}{\mu_p} \left(1 - \frac{\Omega}{K}\right)\right)$ ; where  $\Omega = \frac{d\delta}{\alpha_p \delta - d\sigma\pi}$ .

**Proposition 2.** (1-3) exhibits the following dynamics.

1.  $S_0$  is always unstable.
2. If  $\Omega < 0$  or  $\Omega > K$  then  $S_T$  is asymptotically stable and  $S_L$  does not exist.
3. If  $0 < \Omega < K$  then  $S_T$  is unstable and  $S_L$  exists and is asymptotically stable.

*Proof.* 1. and 2. The stability of  $S_0$  and  $S_T$  follow from standard linearization techniques.

3. The proof of the stability of  $S_L$  is as follows.

$$J(\bar{V}_p, \bar{e}, \bar{T}_p)|_{S_L} = \begin{pmatrix} -\frac{r_p \bar{V}_p}{K} & 0 & -\mu_p \bar{V}_p \\ \pi & -\delta & 0 \\ \frac{\alpha_p \bar{T}_p}{1 + \sigma \bar{e}} & -\frac{\alpha_p \sigma \bar{T}_p \bar{V}_p}{(1 + \sigma \bar{e})^2} & 0 \end{pmatrix}.$$

The eigenvalues of  $J$  satisfy

$$\lambda^3 + a_1 \lambda^2 + a_2 \lambda + a_3 = 0,$$

where

$$\begin{aligned} a_1 &= \delta + \frac{r_p \bar{V}_p}{K}, \\ a_2 &= \frac{\delta r_p \bar{V}_p}{K} + \frac{\alpha_p \mu_p \bar{T}_p \bar{V}_p}{1 + \sigma \bar{e}}, \\ a_3 &= \frac{\delta \alpha_p \mu_p \bar{T}_p \bar{V}_p}{(1 + \sigma \bar{e})^2}. \end{aligned}$$

Clearly  $a_1, a_2, a_3 > 0$  when  $S_L$  exists. Furthermore,

$$\begin{aligned} a_1 a_2 &= \left(\delta + \frac{r_p \bar{V}_p}{K}\right) \left(\frac{\delta r_p \bar{V}_p}{K} + \frac{\alpha_p \mu_p \bar{T}_p \bar{V}_p}{1 + \sigma \bar{e}}\right) \\ &> \frac{\delta \alpha_p \mu_p \bar{T}_p \bar{V}_p}{1 + \sigma \bar{e}} \\ &\geq \frac{\delta \alpha_p \mu_p \bar{T}_p \bar{V}_p}{(1 + \sigma \bar{e})^2} = a_3. \end{aligned}$$

By Routh-Hurwitz criteria, we determine that  $S_L$  is locally asymptotically stable when it exists.  $\square$

## Model analysis of mutation model

$$\frac{dV_p}{dt} = r_p V_p \left( (1 - \phi) - \frac{V_p + V_n}{K} \right) - \mu_p V_p T_p, \quad (4)$$

$$\frac{dV_n}{dt} = r_p V_n \left( 1 - \frac{V_p + V_n}{K} \right) + r_p \phi V_p - \mu_p V_n T_n, \quad (5)$$

$$\frac{de}{dt} = \pi V_p - \delta e, \quad (6)$$

$$\frac{dT_p}{dt} = \frac{\alpha_p V_p T_p}{1 + \sigma e} - dT_p, \quad (7)$$

$$\frac{dT_n}{dt} = \frac{\alpha_n V_n T_n}{1 + \sigma e} - dT_n, \quad (8)$$

The mutation model has several steady states. The first one is biologically irrelevant,  $S_0 = (0, 0, 0, 0, 0)$ . The tolerance state of (4-8) is depicted by the absence of T-cell induced killing of  $V_n$  when  $V_p$  is lost completely,  $S_{T_n} = (0, K, 0, 0, 0)$ .

There are four steady-states that represent immune activation. The first one represents immune activation against  $V_p$  but not  $V_n$ ,

$$S_{L1} = (\bar{\vartheta}_1, \bar{\omega}_1, \bar{e}_1, \bar{\tau}_1, \bar{\sigma}_1) = \left( \Omega, \bar{\omega}_1, \frac{\pi}{\delta} \Omega, \bar{\tau}_1, 0 \right),$$

where

$$\frac{1}{K} \bar{\omega}_1^2 + \left( \frac{\Omega}{K} - 1 \right) \bar{\omega}_1 - \Omega \phi = 0, \quad (9)$$

and

$$\bar{\tau}_1 = \frac{r_p}{\mu_p} \left( 1 - \phi - \frac{\Omega + \bar{\omega}_1}{K} \right). \quad (10)$$

$S_{L1}$  exists when  $0 < \Omega < K$  and  $\phi < 1 - \frac{\Omega + \bar{\omega}_1}{K}$ .

There are two steady states representing competent T-cell response to  $V_n$  but not  $V_p$ : one corresponding to small and intermediate percentage of  $V_p$  mutations,

$$S_{L2} = (\bar{\vartheta}_2, \bar{\omega}_2, \bar{e}_2, \bar{\tau}_2, \bar{\sigma}_2) = \left( \left( 1 - \phi - \frac{d}{K \alpha_n} \right) \frac{\alpha_n \delta K}{\alpha_n \delta + d \sigma \pi}, (1 - \phi) K - \bar{\vartheta}_2, \frac{\pi}{\delta} \bar{\vartheta}_2, 0, \frac{r_p \phi}{\mu_p} \left( \frac{\bar{\vartheta}_2}{\bar{\omega}_2} + 1 \right) \right)$$

which exists when  $\phi < 1 - \frac{d}{K \alpha_n}$ ; and one corresponding to large percentage of mutations leading to complete removal of  $V_p$ ,

$$S_{L3} = (\bar{\vartheta}_3, \bar{\omega}_3, \bar{e}_3, \bar{\tau}_3, \bar{\sigma}_3) = \left( 0, \frac{d}{\alpha_n}, 0, 0, \frac{r_p}{\mu_p} \left( 1 - \frac{d}{\alpha_n K} \right) \right),$$

which exists when  $K > \frac{d}{\alpha_n}$ .

The last steady state corresponds to T-cells response to both viruses types,

$$S_{L4} = (\bar{\vartheta}_4, \bar{\omega}_4, \bar{e}_4, \bar{\tau}_4, \bar{\sigma}_4) = \left( \Omega, \frac{\alpha_p}{\alpha_n} \Omega, \frac{\pi}{\delta} \Omega, \bar{\tau}_4, \bar{\sigma}_4 \right),$$

where

$$\bar{\tau}_4 = \frac{r_p}{\mu_p} \left( 1 - \phi - \frac{\alpha_p + \alpha_n}{\alpha_n} \frac{\Omega}{K} \right), \quad (11)$$

$$\bar{\sigma}_4 = \frac{r_p}{\mu_p} \left( 1 + \phi \frac{\alpha_n}{\alpha_p} - \frac{\alpha_p + \alpha_n}{\alpha_n} \frac{\Omega}{K} \right). \quad (12)$$

$$(13)$$

This state exist if  $\frac{\alpha_p}{\alpha_n} \left( \frac{\alpha_p + \alpha_n}{\alpha_n} \frac{\Omega}{K} - 1 \right) < \phi < 1 - \frac{\alpha_p + \alpha_n}{\alpha_n} \frac{\Omega}{K}$ . Note that the inequality fails for  $\Omega > K$ . Therefore,  $S_{L4}$  doest not exist when  $0 > \Omega > K$ .

**Proposition 3.** *When  $K < d/\alpha_n$  the steady state  $S_{T_n}$  is locally asymptotically stable and  $S_{L2}$ ,  $S_{L3}$  do not exist.*

*Proof.* The stability results follow from standard linearization techniques.  $\square$

**Proposition 4.** *If  $\Omega = \frac{d\delta}{\alpha_p\delta - d\pi\sigma} > K$ , then  $S_T$  is locally asymptotically stable in the system (1-3) and  $S_{T_n}$ ,  $S_{L1}$  and  $S_{L4}$  do not exist in the system (4-8).*

*Proof.* This result follows from Proposition 2 and the existence of  $S_T$  and  $S_{L1}$ .  $\square$

**Proposition 5.** *If  $1 - \frac{\Omega}{K} \left( 1 + \frac{\alpha_p}{\alpha_n} \right) < \phi < 1 - \frac{d}{K\alpha_n}$ ,  $S_{L2}$  is locally asymptotically stable.*

*Proof.* The Jacobian for  $S_{L2}$  is

$$J_{S_{L2}} = \begin{bmatrix} -r_p \frac{\bar{\vartheta}_2}{K} & -r_p \frac{\bar{\vartheta}_2}{K} & 0 & -\mu_p \bar{\vartheta}_2 & 0 \\ r_p \phi - r_p \frac{\bar{\omega}_2}{K} & -r_p \phi \frac{\bar{\vartheta}_2}{\bar{\omega}_2} - r_p \frac{\bar{\omega}_2}{K} & 0 & 0 & -\mu_p \bar{\omega}_2 \\ \pi & 0 & -\delta & 0 & 0 \\ 0 & 0 & 0 & \frac{\alpha_p \bar{\vartheta}_2}{1 + \sigma \bar{e}_2} - d & 0 \\ 0 & \frac{\alpha_n \bar{\sigma}_2}{1 + \sigma \bar{e}_2} & -\alpha_n \sigma \frac{\bar{\omega}_2 \bar{\sigma}_2}{(1 + \sigma \bar{e}_2)^2} & 0 & 0 \end{bmatrix}.$$

Notice that  $\lambda_1 = \frac{\alpha_p \bar{\vartheta}_2}{1 + \sigma \bar{e}_2} - d = \left( \frac{\bar{\vartheta}_2}{\Omega} - 1 \right) d$ . If  $\phi > 1 - \frac{\Omega}{K} \left( 1 + \frac{\alpha_p}{\alpha_n} \right)$  then  $\lambda_1 < 0$ .  $\lambda_{2,3,4,5}$  solve the following polynomial.

$$\begin{aligned} \lambda^4 &+ A\lambda^3 + B\lambda^2 + C\lambda + D = 0, \\ A &= r_p \phi \frac{\bar{\vartheta}_2}{\bar{\omega}_2} + r_p (1 - \phi) + \delta, \\ B &= r_p \delta (1 - \phi) + r_p^2 \phi (1 - \phi) \frac{\bar{\vartheta}_2}{\bar{\omega}_2} + r_p d \phi \left( 1 + \frac{\bar{\vartheta}_2}{\bar{\omega}_2} \right) + r_p \phi \delta \frac{\bar{\vartheta}_2}{\bar{\omega}_2}, \\ C &= r_p \delta d \phi \left( 1 + \frac{\bar{\vartheta}_2}{\bar{\omega}_2} \right) + r_p^2 \phi (1 - \phi) (d + \delta) \frac{\bar{\vartheta}_2}{\bar{\omega}_2}, \\ D &= r_p^2 d \phi (\bar{\vartheta}_2 + \bar{\omega}_2) \bar{\vartheta}_2 \frac{\alpha_n \delta + d \sigma \pi}{\alpha_n \bar{\omega}_2 K}. \end{aligned}$$

Since  $A > 0$ ,  $D > 0$ ,  $AB - C > 0$ , and  $C(AB - C) - A^2 D > 0$  by Routh Hurwitz condition we have that the polynomial has solutions with negative real parts. Therefore, when  $1 - \frac{\Omega}{K} \left( 1 + \frac{\alpha_p}{\alpha_n} \right) < \phi < 1 - \frac{d}{K\alpha_n}$ ,  $S_{L2}$  is locally asymptotically stable.  $\square$

**Proposition 6.** *If  $\phi > 1 - \frac{d}{K\alpha_n}$  and  $\frac{d}{\alpha_n} < K$ ,  $S_{L3}$  is locally asymptotically stable.*

*Proof.* The Jacobian for  $S_{L3}$  is

$$J_{S_{L3}} = \begin{bmatrix} r_p(1-\phi) - \frac{r_p}{K} \frac{d}{\alpha_n} & 0 & 0 & 0 & 0 \\ r_p\phi - \frac{r_p}{K} \frac{d}{\alpha_n} & -\frac{r_p}{K} \frac{d}{\alpha_n} & 0 & 0 & -\mu_p \frac{d}{\alpha_n} \\ \pi & 0 & -\delta & 0 & 0 \\ 0 & 0 & 0 & -d & 0 \\ 0 & \frac{r_p \alpha_n}{\mu_p} \left(1 - \frac{d}{K \alpha_n}\right) & -\frac{\sigma d r_p}{\mu_p} \left(1 - \frac{d}{K \alpha_n}\right) & 0 & 0 \end{bmatrix}.$$

Notice that  $\lambda_1 = r_p(1-\phi) - \frac{r_p}{K} \frac{d}{\alpha_n}$ ,  $\lambda_2 = -\delta$ , and  $\lambda_3 = -d$ . When  $\phi > 1 - \frac{d}{K \alpha_n}$  and  $\frac{d}{\alpha_n} < K$ ,  $\lambda_1 < 0$ .  $\lambda_{4,5}$  are the eigenvalues of

$$\begin{pmatrix} -\frac{r_p}{K} \frac{d}{\alpha_n} & -\frac{d \mu_p}{\alpha_n} \\ \frac{r_p \alpha_n}{\mu_p} \left(1 - \frac{d}{K \alpha_n}\right) & 0 \end{pmatrix}.$$

Since

$$\begin{aligned} \text{tr} &= -\frac{r_p}{K} \frac{d}{\alpha_n} < 0, \\ \det &= r_p d \left(1 - \frac{d}{K \alpha_n}\right) > 0, \end{aligned}$$

when  $K \alpha_n > d$ , the eigenvalues  $\lambda_{4,5}$  are always negative. □

## References
